# Supplementary material for: Diastereospecific synthesis of phosphinidene-capped cyclodextrins leading to “introverted” ligands
Source: Royal Society of Chemistry journal article supplement (doi:10.1039/b315802k), 2004-01-01
Supplement: b315802k.doc [file b315802k.doc]

# Supplementary material for

**Diastereospecific synthesis of phosphinidene-capped cyclodextrins leading to "introverted" ligands**

# Eric Engeldinger,Laurent Poorters, Dominique Armspach, Dominique Matt and Loïc Toupet

DMBA stands for *o*-C6H4NMe2. The assignments were made using COSY, ROESY, TOCSY, and HMQC, HMBC and 13C {1H, 31P} NMR spectroscopy.

**2**: A solution of *n*-BuLi in hexane (1.6 M, 2.5 mL, 4.00 mmol) was added to a solution of PhPH2 (0.200 g, 1.82 mmol) in THF (14 mL) at room temperature. The resulting yellow suspension was stirred for 1 h, whereupon an aliquot of the latter (8 mL, 1.04 mmol) was added dropwise using a syringe to a solution of **1** (0.320 g, 0.236 mmol) in THF (20 mL) at 0°C, which turned gradually dark red. After stirring overnight at room temperature, THF was evaporated. The yellow residue was treated in benzene (20 mL) and the resulting suspension filtered over celite. The solvent was evaporated and excess PhPH2 was eliminated *in vacuo* under moderate heating, yielding **2** as a white solid (0.190 g, 64 %). *R*f (CH2Cl2/MeOH, 94 : 6, v/v) = 0.30. 1H NMR (300 MHz, CDCl3): ** = 1.78 (br d, 2*J*H-6b,H-6a = 16.4 Hz, 1H; H-6aA or B), 1.81 (m, 1H; H-6aB or A), 3.22 (s, 3H; CH3O-6), 3.29 (s, 3H; CH3O-6), 3.36 (s, 3H; CH3O-6), 3.38 (s, 3H; CH3O-6), 3.48 (s, 6H; CH3O-2), 3.49 (s, 3H; CH3O-2), 3.50 (s, 3H; CH3O-2), 3.51 (s, 3H; CH3O-2), 3.52 (s, 3H; CH3O-2), 3.62 (s, 3H; CH3O-3), 3.64 (s, 3H; CH3O-3), 3.65 (s, 6H; CH3O-3), 3.66 (s, 3H; CH3O-3), 3.69 (s, 3H; CH3O-3), 2.78-4.09 (33H; H-2, H-3, H-4, H-5A or B,C,D,E,F, H-6aC,D,E,F, H-6b), 4.33 (m, 1H; H-5B or A), 4.99 (d, 3*J*H-2,H-1 = 3.3 Hz, 1H; H-1), 5.02 (d, 3*J*H-2,H-1 = 4.4 Hz, 1H; H-1), 5.04 (d, 3*J*H-2,H-1 = 3.2 Hz, 1H; H-1), 5.06 (2d, 3*J*H-2,H-1 = 3.1 Hz, 2H; H-1), 5.07 (d, 3*J*H-2,H-1 = 3.2 Hz, 1H; H-1), 7.29-7.35 (3H; *m*-H, *p*-H), 7.43-7.49 (m, 2H; *o*-H); 13C{1H} NMR (75.5 MHz, CDCl3): ** = 26.72 (d, *J*C,P = 16.8 Hz; C-6A or B), 34.28 (d, *J*C,P = 19.9 Hz; C-6B or A), 57.50, 57.70, 57.83, 57.88 and 57.98 [2] (CH3O-2), 58.75, 58.87 and 58.92 [2] (CH3O-6), 61.58, 61.66 [2], 61.88, 61.90 and 62.02 (CH3O-3), 70.88, 71.02, 71.24 and 71.35 (C-6C,D,E,F), 70.83 [2], 70.94 and 71.09 (C-5C,D,E,F), 72.52 (C-4A or B), 73.02 (C-4B or A), 81.27, 81.32, 81.35, 81.45, 81.51, 81.54, 81.73, 81.80, 81.92, 82.01, 82.19 [2], 82.22, 82.24, 82.35 and 83.43 (C-2, C-3, C-4C,D,E,F), 87.35 (br d, 2*J*C,P = 3.7 Hz; C-5A or B), 88.77 (d, 2*J*C,P = 3.7 Hz; C-5B or A), 97.59 (br), 99.36, 99.65, 99.68, 99.89 and 100.26 (C-1), 128.32 (d, 3*J*C,P = 6.8 Hz; *m*-C), 128.47 (d, 4*J*C,P = 1.9 Hz; *p*-C), 131.37 (d, 2*J*C,P = 18.6 Hz; *o-*C), 140.64 (d, *J*C,P = 10.5, Hz; *ipso*-C); 31P{1H} NMR (121.5 MHz, CDCl3): ** = -16.2 (s); elemental analysis (%) calcd for C58H95O28P (1271.33): C 54.80, H 7.53; found: C 54.82, H 7.37.

**4**: A solution of *n*-BuLi in hexane (1.6 M, 2.9 mL, 4.56 mmol) was added to a solution of PhPH2 (0.250 g, 2.27 mmol) in THF (15 mL) at room temperature. The resulting yellow suspension was stirred for 1 h, whereupon an aliquot of the latter (13 mL, 1.97 mmol) was added dropwise, using a syringe, to a solution of **3** (0.600 g, 0.443 mmol) in THF (80 mL) at -30°C, which turned gradually dark red. After stirring overnight at room temperature, the solution was concentrated to *ca.* 10 mL and dry MeOH was added (5 mL). Evaporation to dryness afforded a pale yellow residue which was taken up in benzene (20 mL). The resulting suspension was filtered over celite to eliminate lithium salts and the solvent was evaporated. The residue was then suspended in hexane and sonicated to dissolve the target compound prior to filtration over celite and evaporation of the solvent. This procedure was repeated one more time and excess PhPH2 was eliminated *in vacuo* under moderate heating, yielding **4** as a white powder. (0.335 g, 60 %). *R*f (CH2Cl2/MeOH, 94 : 6, v/v) = 0.26; Mp 175°C dec. 1H NMR (300 MHz, CDCl3): ** (assignment by COSY) = 1.64 (dt, 2*J*H-6b,H-6a = 14.7 Hz, 3*J*H-5,H-6a = 2*J*P,H-6a = 6.0 Hz, 1H; H-6aA or C), 2.05 (m, 1H; H-6aC or A), 2.23 (br dd, 2*J*H-6a,H-6b = 14.7 Hz, 2*J*P,H-6b = 18.6 Hz, 1H; H-6bA or C), 2.49 (br d, 2*J*H-6a,H-6b = 13.5 Hz, 1H, H-6bC or A), 2.54 and 3.20 (AB, 2*J*A,B = 11.3 Hz, 2H, H-6), 2.87 (s, 3H; CH3O-6), 3.36 (s, 3H; OCH3), 3.38 (s, 3H; OCH3), 3.39 (s, 3H; OCH3), 3.41 (s, 3H; OCH3), 3.43 (s, 6H; OCH3), 3.51 (s, 3H; OCH3), 3.52 (s, 6H; OCH3), 3.54 (s, 3H; OCH3), 3.55 (s, 3H; OCH3), 3.64 (s, 3H; OCH3), 3.69 (s, 3H; OCH3), 3.71 (s, 3H; OCH3), 3.73 (s, 3H; OCH3), 3.90 (br dd, 3*J*H-6a,H-5 = 6.0 Hz, 1H, H-5A or C), 4.09 (t, 3*J*H-3,H-4 = 3*J*H-5,H-4 = 5.2 Hz, 1H, H-4), 3.07-4.14 (26H; H-2, H-3, H-4, H-5, H-6), 4.33 (br q, 3*J*H-6a,H-5 = 3*J*H-4,H-5 = 3*J*P,H-5 = 10.0 Hz, 1H; H-5C or A), 4.41 (dd, 3*J*H-6,H-5 = 10.2 Hz, 3*J*H-4,H-5 = 5.2 Hz, 1H; H-5), 4.73 (d, 3*J*H-2,H-1 = 3.4 Hz, 1H; H-1), 4.94 (d, 3*J*H-2,H-1 = 3.4 Hz, 1H; H-1), 5.07 (d, 3*J*H-2,H-1 = 3.2 Hz, 1H; H-1), 5.19 (d, 3*J*H-2,H-1 = 2.6 Hz, 1H; H-1), 5.20 (d, 3*J*H-2,H-1 = 2.4 Hz, 1H; H-1), 5.82 (d, 3*J*H-2,H-1 = 3.4 Hz, 1H; H-1), 7.27-7.35 (3H; *m*-H, *p*-H), 7.46-7.51 (m, 2H; *o*-H); 13C{1H} NMR (75.5 MHz, CDCl3): ** = 25.37 (d, *J*C,P = 18.6 Hz; C-6A or C), 33.02 (d, *J*C,P = 13.7 Hz; C-6C or A), 57.40, 57.90 [2], 57.92, 58.47 and 58.98 (CH3O-2), 59.02, 59.11, 59.22 and 59.26 (CH3O-6), 59.69, 59.99, 60.65, 61.63, 61.74 and 62.14 (CH3O-3), 67.75 (d, 2*J*C,P = 8.1 Hz; C-5A or C), 70.66, 71.01, 71.40 and 71.67 (C-5C,D,E,F), 70.87, 71.40, 72.02 and 75.48 (C-6C,D,E,F), 72.41 and 72.71 (C-4A,C, tent. assignment), 75.59 (d, 2*J*C,P = 10.6 Hz; C-5C or A), 78.96, 79.04, 80.40, 80.49, 81.47, 81.50, 81.69, 82.31, 81.47 [2], 82.57, 82.89, 82.92, 83.38, 83.47 and 83.67 (C-2, C-3, C-4C,D,E,F), 92.58, 95.14, 95.95, 98.58, 99.22 and 100.06 (C-1), 127.97 (d, 3*J*C,P = 6.2 Hz; *m*-C), 128.11 (s; *p*-C), 131.56 (d, 2*J*C,P = 18.0 Hz; *o*-C), 140.80 (d, *J*C,P = 15.5, Hz; *ipso*-C); 31P{1H} NMR (121.5 MHz, CDCl3): ** = -21.1 (s); elemental analysis (%) calcd for C58H95O28P0.2 CHCl3 (1271.33 + 16.99): C 54.26, H 7.46 found: C 54.03, H 7.24.

**5**: To a solution of **4** (0.050 g, 0.039 mmol) in CH2Cl2 (5 mL) was added H2O2 (aq) (30 wt. %, 8 **L, 0.078 mmol). The mixture was stirred for 2 h at r.t. whereupon it was washed twice with water and dried (MgSO4). Evaporation of CH2Cl2 afforded **5** quantitavely (0.050 g) as a microcristalline powder. *R*f (CH2Cl2/MeOH, 94 : 6, v/v) = 0.20; Mp 220°C dec. 1H NMR (300 MHz, CDCl3): ** (assignment by COSY) = 1.60 (m, 1H; H-6aA or C), 2.02 (br dd, 2*J*H-6b,H-6a = 14.9 Hz, 3*J*H-5P,H-6a = 12.3 Hz, 1H; H-6aC or A), 2.44 (br dd, 2*J*H-6b,H-6a = 18.5 Hz, 3*J*H-5P,H-6a = 16.2 Hz, 1H; H-6bA or C), 2.71 and 2.96 (AB, 2*J*A,B = 11.4 Hz, 2H; H-6), 2.87 (s, 3H; CH3O-6), 3.03 (br dd, 2*J*H-6b,H-6a = 14.9 Hz, 1H, H-6bC or A), 3.06-3.17 (7H, H-2, H-4), 3.32 (s, 3H; OCH3), 3.38 (s, 3H; OCH3), 3.39 (s, 3H; OCH3), 3.43 (s, 3H; OCH3), 3.44 (s, 3H; OCH3), 3.46 (s, 3H; OCH3), 3.49 (s, 6H; OCH3), 3.51 (s, 3H; OCH3), 3.52 (s, 3H; OCH3), 3.54 (s, 3H; OCH3), 3.66 (s, 6H; OCH3), 3.67 (s, 3H; OCH3), 3.69 (s, 3H; OCH3), 4.37 (m, 1H; H-5A or C), 3.31-4.50 (21H; H-3, H-4, H-5B,D,E,F, H-6), 4.66 (d, 3*J*H-2,H-1 = 3.2 Hz, 1H; H-1), 4.68 (br q, 2*J*H-6a,H-5 = 3*J*H-4P,H-5 = 12.3 Hz, 1H; H-5C or A), 4.97 (d, 3*J*H-2,H-1 = 3.3 Hz, 1H; H-1), 5.05 (d, 3*J*H-2,H-1 = 3.7 Hz, 1H; H-1), 5.06 (d, 3*J*H-2,H-1 = 3.3 Hz, 1H; H-1), 5.25 (d, 3*J*H-2,H-1 = 3.6 Hz, 1H; H-1), 5.69 (d, 3*J*H-2,H-1 = 2.9 Hz, 1H; H-1), 7.43-7.52 (3H; *m*-H, *p*-H), 7.59-7.66 (m, 2H; *o*-H); 13C{1H} NMR (75.5 MHz, CDCl3): ** = 26.20 (d, *J*C,P = 68.9 Hz; C-6A or C), 37.29 (d, *J*C,P = 69.5 Hz; C-6C or A), 57.23, 57.64, 58.01, 58.27, 58.46 and 58.76 (CH3O-2), 58.88, 58.99, 59.17 and 59.26 (CH3O-6), 59.46, 60.36, 61.06, 61.49, 61.69 and 61.80 (CH3O-3), 65.41 (d, 3*J*C,P = 1.9 Hz; C-4A or C, tent. assignment), 66.23 (d, 2*J*C,P = 6.2 Hz; C-5A or C), 69.54, 70.46, 71.14 and 72.75 (C-5C,D,E,F), 71.66, 71.87, 72.45 and 75.92 (C-6C,D,E,F), 75.71 (d, 2*J*C,P = 11.2 Hz; C-5C or A), 78.44, 78.73, 80.72 [2], 80.91, 81.12, 81.28, 82.04, 82.05, 82.25, 82.52, 82.89, 83.12, 83.22, 83.44, 83.52 and 83.66 (C-2, C-3, C-4C or A,B,D,E,F), 92.73, 95.36, 95.68, 98.99, 99.91 and 100.05 (C-1), 128.10 (d, 2*J*C,P = 11.8 Hz; *o*-C), 130.20 (d, 3*J*C,P = 9.3 Hz; *m*-C), 131.13 (d, 4*J*C,P = 2.5 Hz; *p*-C), 135.57 (d, *J*C,P = 96.2 Hz; *ipso*-C); 31P{1H} NMR (121.5 MHz, CDCl3): ** = 35.3 (s); elemental analysis (%) calcd for C58H95O29P (1287.33): C 54.11, H 7.44; found: C 54.43, H 7.91.

**6**: To a solution of **2** (0.040 g, 0.0315 mmol) in CH2Cl2 (10 mL) was added a solution of [(*o*-C6H4CH2NMe2)PdCl]2 (0.009 g, 0.0163 mmol) in CH2Cl2 (5 mL). After 15 min. the reaction mixture was concentrated to 2 mL and pentane (150 mL) was added to precipitate side products, which were then filtered off over celite. Evaporation of pentane afforded **6** as a yellow powder (0.036 g, 74 %). *R*f (CH2Cl2/MeOH, 94 : 6, v/v) = 0.25; Mp 162°C dec. 1H NMR (500 MHz, CDCl3, 25°C): ** (assignment by COSY, ROESY and TOCSY) = 2.03 (dt, 2*J*H-6b,H-6a = 13.4 Hz, 3*J*H-5,H-6a = 13.4 Hz, 2*J*P,H-6a = 7.8 Hz 1H; H-6aB), 2.60 (d, 4*J*P,H = 1.4 Hz, 3H; NCH3), 2.73 (ddd, 2*J*H-6b,H-6a = 15.0 Hz, 3*J*H-5,H-6a = 2.0 Hz, 2*J*P,H-6a = 7.8 Hz, 1H; H-6aA), 3.00 (t, 3*J*H-5,H-4 = 9.4 Hz, 3*J*H-3,H-4 = 9.4 Hz; H-4B), 3.03 (d, 4*J*P,H = 2.6 Hz, 3H; NCH3), 3.08 (s, 3H; CH3O-6), 3.12-3.23 (6 overlapping dd, 6H; H-2), 3.32 (s, 3H; CH3O-6), 3.35 (t, 3*J*H-5,H-4 = 8.7 Hz, 3*J*H-3,H-4 = 8.7 Hz; H-4A), 3.39 (s, 3H; CH3O-6), 3.40 (s, 3H; CH3O-6), 3.46-3.50 (2 overlapping signals, 2H; H-6aD and NCH2), 3.47 (s, 6H; CH3O-2), 3.48 (s, 3H; CH3O-2), 3.48 (s, 3H; CH3O-2), 3.49 (s, 6H; CH3O-2), 3.51 (s, 3H; CH3O-2), 3.52-3.59 (6 overlapping signals, 6H; H-3A,B,C, H-6aE,F, H-6bA), 3.60 (s, 3H; CH3O-3), 3.62-3.76 (7 overlapping signals, 7H; H-4C,D,E,F, H-3D,E,F), 3.64 (s, 3H; CH3O-3), 3.66 (s, 3H; CH3O-3), 3.66 (s, 3H; CH3O-3), 3.67 (s, 3H; CH3O-3), 3.68 (s, 3H; CH3O-3), 3.88-3.94 (5 overlapping signals, 5H; H-6aC, H-6bB,D, H-5D,E), 4.01 (dd, 2*J*H-6a,H-6b = 10.1 Hz, 3*J*H-6a,H-5 = 2.9 Hz, 1H; H-6bE), 4.24 (br d, 3*J*= 9.6 Hz, 1H; H-5F), 4.27 (br d, 3*J*= 9.8 Hz, 1H; H-5C), 4.50 (m, 1H; H-5B), 4.54 (d, 2*J* = 12.8 Hz, 1H; NCH2), 4.74 (dd, 2*J*H-6a,H-6b = 11.0 Hz, 3*J*H-6a,H-5 = 2.3 Hz, 1H; H-6bF), 4.88 (d, 3*J*H-2,H-1 = 3.4 Hz, 1H; H-1C), 4.97 (m, 1H; H-5A), 5.05 (d, 3*J*H-2,H-1 = 3.4 Hz, 1H; H-1F), 5.08 (d, 3*J*H-2,H-1 = 3.2 Hz, 2H; H-1E), 5.10 (2d, 3*J*H-2,H-1 = 3.4 Hz, 2H; H-1B,D), 5.13 (d, 3*J*H-2,H-1 = 3.9 Hz, 1H; H-1A), 6.25 (br t, *J*= 7.0 Hz, 1H; *o*-H of DMBA), 6.34 (br t, *J*= 7.4 Hz, 1H; *m*-Hof DMBA), 6.68 (dt, *J*= 7.4 and 0.8 Hz, 1H; *p*-H of DMBA), 6.87 (br d, *J*= 7.2 Hz, 1H; *m*-H of DMBA), 7.11-7.18 (3H; *m*-H, *p*-H), 7.46-7.50 (m, 2H; *o*-H), H-6bC not assigned; 13C{1H} NMR (75.5 MHz, CDCl3): ** = 35.28 (d, *J*C,P= 20.5 Hz; C-6A or B), 36.07 (d, *J*C,P = 27.3 Hz; C-6B or A), 49.62 (br d; NCH3), 51.68 (br d; NCH3), 57.20, 57.46, 57.55, 57.58 and 57.81 [2] (CH3O-2), 58.73, 59.07, 59.12 and 59.19 (CH3O-6), 61.47, 61.73, 61.85 [2], 62.03 and 62.38 (CH3O-3), 66.20 (d, 3 *J*C,P = 8.1 Hz; C-4A or B), 68.13 (d, 3*J*C,P = 2.2 Hz; C-4B or A), 70.47, 70.91, 71.04 and 71.21 (C-5C,D,E,F), 71.46, 71.80, 72.00 and 72.21 (C-6C,D,E,F), 73.33 (NCH2), 80.07, 80.69, 80.83, 80.92, 81.04, 81.44, 81.61, 81.68, 82.07 [2], 82.13, 82.32, 82.43 [2], 82.53 and 83.56 (C-2, C-3, C-4C,D,E,F), 88.77 (d, 2*J*C,P = 8.1 Hz; C-5A or B), 91.38 (d, 2*J*C,P = 3.7 Hz; C-5B or A), 97.45, 99.94, 99.99, 100.42 [2] and 101.40 (C-1), 122.34 (*m*-C of DMBA), 123.50 (*p*-C of DMBA), 125.38 (d, 3*J*C,P = 5.6 Hz; *m*-C of DMBA), 127.77 (d, 3*J*C,P = 10.6 Hz; *m*-C), 129.61 (*p*-C), 132.17 (d, 2*J*C,P = 11.2 Hz; *o*-C), 135.67 (d, 2*J*C,P = 10.5 Hz; *o*-C of DMBA), 136.92 (d, *J*C,P = 51.5 Hz; *ipso*-C), 146.39 (d, *J*C,P = 2.3 Hz; C*quat* of DMBA), 153.91 (C*quat* of DMBA); 31P{1H} NMR (121.5 MHz, CDCl3): ** = 17.4 (s); elemental analysis (%) calcd for C67H107ClNO28PPd (1547.39): C 52.00, H 6.97; found: C 51.67, H 6.94; MS (FAB): *m/z* (%):1546.8 (1) [*M*+H]+, 1510.8 (8) [*M*–Cl]+.

Ligand **8**:

**6A,6B,6D,6E-tetradeoxy-(**2-6A,6B-phenylphosphinidene)-(**2-6D,6E-phenylphosphinidene)-2A,2B,2C,2D,2E,2F,3A,3B,3C,3D,3E,3F,6C,6F-tetradeca-*O*-methyl-**-CD.** A solution of *n*-BuLi in hexane (1.6 M, 0.51 mL, 0.81 mmol) was added dropwise to a stirred solution of PhPH2 (0.045 g, 0.41 mmol, ca. 0.045 mL) in THF (20 mL) at room temperature. After 1.5 h, the thus obtained solution was added slowly (within 1 h) using a cannula to a stirred solution, maintained at 18–20 °C, of tetramesylate **7** (0.200 g, 0.14 mmol) in THF (20 mL). The solution was stirred for a further 14 h. The solvent was then removed under vacuum and excess Li2PPh hydrolized with methanol. After evaporation to dryness, the residue was treated with toluene and the resulting suspension filtered over a bed of Celite. Toluene was then removed under vacuum to afford analytically pure **8** (SiO2, MeOH/CH2Cl2, 8:92 v/v, *R*f = 0.37). Yield: 0.160 g, 90 %. 1H NMR (500.13 MHz, CDCl3, 25 °C):  = 1.74-1.85 (m, 4 H, H-6aA,B,D,E), 3.00 (broad dd, 2 H, 2*J*H-6b,H-6a = 15.1 Hz, 2*J*H-6b,P = 15.1 Hz, H-6bA,D or B,E), 3.06 (s, 6 H, OMe), 3.14 (dd, 2 H, 3*J*H-2,H-1 = 3.2 Hz, 3*J*H-2,H-3 = 9.9 Hz, H-2B,E or A,D), 3.19 (dd, 2 H, 3*J*H-2,H-1 = 3.4 Hz, 3*J*H-2,H-3 = 9.8 Hz, H-2C,F), 3.20-3.33 (6 H, H-4A,B,D,E, H-6bB,E or A,D), 3.44-3.70 (12 H, H-2A,D or B,E, H-3, H-4C,F, H-6bC,F), 3.47 (s, 6 H, OMe), 3.47 (s, 6 H, OMe), 3.52 (s, 6 H, OMe), 3.62 (s, 6 H, OMe), 3.65 (s, 6 H, OMe), 3.68 (s, 6 H, OMe), 3.99-4.06 (6 H, H-5A,D or B,E, H-5C,F, H-6aC,F), 4.30-4.35 (m, 2 H, H-5B,E or A,D), 4.98 (d, 2 H, 3*J*H-1,H-2 = 3.2 Hz, H-1B,E or A,D), 5.03 (d, 2 H, 3*J*H-1,H-2 = 4.5 Hz, H-1A,D or B,E), 5.04 (d, 2 H, 3*J*H-1,H-2 = 3.4 Hz, H-1C,F), 7.17-7.20 (m, 4 H, *m*-H), 7.24-7.27 (m, 2 H, *p*-H), 7.46-7.49 (m, 4 H, *o*-H); 13C {1H,31P} NMR (125.77 MHz, CDCl3, 25 °C): = 26.6 (C-6A,D or B,E), 34.0 (C-6B,E or A,D), 57.5, 57.5, 57.6 (2-O*C*H3), 58.7 (6-OCH3), 61.6, 61.9, 62.1 (3-OCH3), 66.2 (C-5A,D or B,E), 70.5 (C-5C,F), 70.7 (C-6C,F), 72.9 (C-5B,E or A,D), 81.1 (C-3B,E or A,D), 81.6 (C-3C,F), 81.7 (C-2B,E or A,D), 81.9 (C-2C,F), 82.2 (C-4C,F), 82.4 (C-2A,D or B,E), 83.5 (C-3A,D or B,E), 87.8 (C-4A,D or B,E), 88.8 (C-4B,E or A,D), 97.6 (C-1A,D or B,E), 99.9 (C-1B,E or A,D), 100.3 (C-1C,F), 128.3 (*m*-C), 128.5 (*p*-C), 131.8 (*o*-C), 140.4 (*ipso*-C); 31P {1H} NMR (121.5 MHz, CDCl3, 25 °C):  = - 16.8 (s). C62H94O26P2•0.5 CH2Cl2 (1317.37 + 42.47): calcd C, 55.20; H, 7.04; found: C, 55.46; H, 7.01. MS (FAB): *m/z* (%): 1317.4 (100) [*M* + H]+.

**9**: A solution of [PtCl2(PhCN)2] (0.047 g, 0.10 mmol) and **8** (0.130 g, 0.10 mmol) in toluene (25 mL) was refluxed for 3 d. The solution was concentrated to ca. 5 mL and pentane (140 mL) was added to precipitate small amounts of unreacted starting complex. The solution was filtered over Celite. Evaporation of pentane afforded analytically pure **9** as a pale yellow powder. Yield: 0.153 g, 98 %. 1H NMR (300.13 MHz, CDCl3, 25 °C):  = 2.24-2.33 (m, 2 H, H-6aA,D or B,E), 2.63 (ddd, 2 H, 2*J*H-6a,H-6b = 5.5 Hz, 3*J*H-6a,H-5 = 5.5 Hz, 3*J*H-6a,P = 14.6 Hz, H-6aB,E or A,D), 3.07-3.22 (10 H, H-2, H-4A,B,D,E), 3.31-3.39 (4 H, H-6bA,B,D,E), 3.40-3.46 (m, 2 H, H-3A,D or B,E), 3.44 (s, 6 H, OMe), 3.47 (s, 6 H, OMe), 3.52 (s, 12 H, OMe), 3.52-3.65 (4 H, H-3B,E or A,D, H-3C,F), 3.64 (s, 6 H, OMe), 3.65 (s, 6 H, OMe), 3.74 (s, 6 H, OMe), 3.79-3.82 (m, 2 H, H-6aC,F), 3.83-3.89 (m, 2 H, H-4C,F), 4.51-4.64 (6 H, H-5A,D or B,E, H-5C,F, H-6bC,F), 4.93 (d, 2 H, 3*J*H-1,H-2 = 4.2 Hz, H-1A,D or B,E), 5.05 (two overlapping d, 4 H, H-1B,E or A,D, H-1C,F), 5.19-5.27 (m, 2 H, H-5B,E or A,D), 7.28-7.37 (6 H, *m*-H, *p*-H), 7.49-7.50 (m, 4 H, *o*-H); 13C {1H} NMR (75.46 MHz, CDCl3, 25 °C): = 30.2 (m, C-6A,D or B,E), 35.8 (virtual t, |1*J*C,P + 3*J*C,P’| = 26.6 Hz, C-6B,E or A,D), 57.5, 58.0, 58.7 (2-O*C*H3), 59.3 (6-OCH3), 61.7, 61.7, 62.0 (3-OCH3), 66.1 (C-5A,D or B,E), 67.9 (C-5B,E or A,D), 70.6 (C-5C,F), 71.8 (C-6C,F), 80.6 (C-4C,F), 81.1 (C-3C,F), 81.3 (C-3B,E or A,D), 81.4 [2] (C-2A,B,D,E), 83.0 (C-3A,D or B,E), 83.2 (C-2C,F), 86.5 (virtual t, |3*J*C,P + 5*J*C,P’| = 9.5 Hz, C-4A,D or B,E), 89.9 (C-4B,E or A,D), 97.3 (C-1B,E or A,D), 97.5 (C-1A,D or B,E), 100.9 (C-1C,F), 127.8 (virtual t, |3*J*C,P + 5*J*C,P’| = 10.0 Hz, *m*-C), 129.6 (*p*-C), 131.3 (virtual t, |2*J*C,P + 4*J*C,P’| = 9.5 Hz, *o*-C), 133.4 (virtual t, |1*J*C,P + 3*J*C,P’| = 57.8 Hz, *ipso*-C); 31P {1H} NMR (121.5 MHz, CDCl3, 25 °C):  = - 6.5 (s with Pt satellites, 1*J*(Pt,P) = 2463 Hz). C62H94O26P2PtCl2 (1583.37): calcd C, 47.03; H, 5.98; found: C, 47.14; H, 6.05. MS (FAB): *m/z* (%): 1547.2 (100) [*M* – Cl]+.

**10**: A solution of [PdCl2(PhCN)2] (0.047 g, 0.12 mmol) in CH2Cl2 (5 mL) was added at room temperature to a solution of **8** (0.160 g, 0.12 mmol) in CH2Cl2 (10 mL) under vigorous stirring. After 0.5 h the reaction mixture was concentrated to 5 mL and pentane (50 mL) was added. The suspension was then filtered over celite. Evaporation of pentane afforded analytically pure **10** as a pale yellow powder. Washings of the celite layer with hot heptane afforded further amounts of **10**. Yield: 0.174 g, 97 %. 1H NMR (300.13 MHz, CDCl3, 25 °C):  = 2.08-2.19 (m, 2 H, H-6aA,D or B,E), 2.63 (ddd, 2 H, 2*J*H-6a,H-6b = 4.7 Hz, 3*J*(H-6a,H-5) = 4.7 Hz, 3*J*H-6a,P = 14.7 Hz, H-6aB,E or A,D), 3.08-3.22 (10 H, H-2, H-4A,B,D,E), 3.33-3.37 (4 H, H-6bA,B,D,E), 3.39-3.43 (m, 2 H, H-3A,D or B,E), 3.45 (s, 6 H, OMe), 3.47 (s, 6 H, OMe), 3.52 (s, 12 H, OMe), 3.54-3.68 (4 H, H-3B,E or A,D, H-3C,F), 3.64 (s, 6 H, OMe), 3.65 (s, 6 H, OMe), 3.73 (s, 6 H, OMe), 3.79-3.88 (4 H, H-4C,F, H-6aC,F), 4.48-4.62 (6 H, H-5A,D or B,E, H-5C,F, H-6bC,F), 4.93 (d, 2 H, 3*J*H-1,H-2 = 4.2 Hz, H-1A,D or B,E), 5.05 (d, 4 H, 3*J*H-1,H-2 = 3.4 Hz, H-1B,E or A,D, H-1C,F), 5.19-5.28 (m, 2 H, H-5B,E or A,D), 7.30-7.36 (6 H, *m*-H, *p*-H), 7.48-7.53 (m, 4 H, *o*-H). 13C {1H} NMR (75.46 MHz, CDCl3, 25 °C): = 30.2 (virtual t, |1*J*C,P + 3*J*C,P’| = 25.0 Hz, C-6A,D or B,E), 36.2 (virtual t, |1*J*C,P + 3*J*C,P’| = 20.0 Hz, C-6B,E or A,D), 57.5, 58.0, 58.6 (2-O*C*H3), 59.4 (6-OCH3), 61.7, 61.7, 62.0 (3-OCH3), 66.0 (br signal with triplet shape, C-5A,D or B,E), 68.3 (br signal with triplet shape,C-5B,E or A,D), 70.8 (C-5C,F), 72.0 (C-6C,F), 80.9, 81.0, 81.1, 81.3, 81.4, 82.9, 83.1 (C-2, C-3, C-4C,F), 86.6 (virtual t, |3*J*C,P + 5*J*C,P’| = 9.5 Hz, C-4A,D or B,E), 89.9 (br signal with triplet shape, C-4B,E or A,D), 97.5 [2] (C-1A,B,D,E), 101.0 (C-1C,F), 127.9 (virtual t, |3*J*C,P + 5*J*C,P’| = 9.5 Hz, *m*-C), 129.6 (*p*-C), 131.3 (virtual t, |2*J*C,P + 4*J*C,P’| = 9.5 Hz, *o*-C), 134.5 (virtual t, |1*J*C,P + 3*J*C,P’| = 50.0 Hz, *ipso*-C); 31P {1H} NMR (121.5 MHz, CDCl3, 25 °C):  = -0.4 (s). C62H94O26P2PdCl2•0.5CH2Cl2 (1494.68 + 42.47): calcd C, 48.84; H, 6.23; found: C, 48.73; H, 6.30. MS (Maldi TOF): *m/z* (%): 1494 (19) [*M*]+, 1459 (70) [M – Cl]+, 1422 (100) [M – 2Cl]+.

**11**: A solution of [PdClMe(1,5-cyclooctadiene)] (0.024 g, 0.08 mmol) in CH2Cl2 (3 mL) was added to a solution of **8** (0.110 g, 0.08 mmol) in CH2Cl2 (20 mL) under vigorous stirring. After stirring for 14 h, the solution was concentrated to 5 mL and pentane (120 mL) was added. Filtration through Celite and subsequent precipitation afforded pure **11** as a pale yellow powder. Yield: 0.117 g, 95 %. 1H NMR (500.13 MHz, CDCl3, 25 °C):  = -0.68 (t, 3 H, 2*J*H,P = 6.8 Hz, CH3), 2.04-2.11 (m, 2 H, H-6aA,D or B,E), 2.34-2.40 (m, 2 H, H-6aB,E or A,D), 3.06-3.20 (10 H, H-2, H-4A,B,D,E), 3.23 (broad d, 2 H, 2*J*H-6b,H-6a = 13.8 Hz, H-6bA,D or B,E), 3.29-3.36 (m, 2 H, H-6bB,E or A,D), 3.39 (s, 6 H, OMe), 3.46-3.71 (8 H, H-3, H-6aC,F), 3.46 (s, 6 H, OMe), 3.49 (s, 6 H, OMe), 3.50 (s, 6 H, OMe), 3.63 (s, 6 H, OMe), 3.64 (s, 6 H, OMe), 3.70 (s, 6 H, OMe), 3.78 (overlapping dd, 2 H, 3*J*H-4,H-3 = 3*J*H-4,H-3 = 9.0 Hz, H-4C,F), 4.47 (dd, 2 H, 3*J*H-6b,H-5 = 2.9 Hz, 2*J*H-6b,H-6a = 10.8 Hz, H-6bC,F), 4.70-4.76 (4 H, H-5A,D or B,E, H-5C,F), 4.91 (d, 2 H, 3*J*H-1,H-2 = 4.3 Hz, H-1A,D or B,E), 5.01 (d, 2 H, 3*J*H-1,H-2 = 3.6 Hz, H-1C,F), 5.03 (d, 2 H, 3*J*H-1,H-2 = 3.3 Hz, H-1B,E or A,D), 5.37-5.42 (m, 2 H, H-5B,E or A,D), 7.29-7.30 (m, 2 H, *p*-H), 7.33-7.35 (m, 4 H, *m*-H), 7.38-7.41 (m, 4 H, *o*-H); 13C {1H} NMR (125.77 MHz, CDCl3, 25 °C): = 6.2 (br signal with triplet shape, CH3), 29.4 (virtual t, |1*J*C,P + 3*J*C,P’| = 22.0, C-6A,D or B,E), 35.8 (virtual t, |1*J*C,P + 3*J*C,P’| = 18.5 Hz, C-6B,E or A,D), 57.5, 57.8, 58.3 (2-O*C*H3), 59.2 (6-OCH3), 61.7, 61.8, 62.1 (3-OCH3), 65.7 (br signal with triplet shape, C-5A,D or B,E), 68.3 (virtual t, |2*J*C,P + 4*J*C,P’| = 9.0 Hz, C-5B,E or A,D), 70.3 (C-5C,F), 72.0 (C-6C,F), 81.0 [2] (C-3B,E or A,D, C-3C,F), 81.3 (C-4C,F), 81.4 (C-2B,E or A,D), 81.7 (C-2C,F), 82.8 (C-3A,D or B,E), 83.2 (C-2A,D or B,E), 87.4 (virtual t, |3*J*C,P + 5*J*C,P’| = 9.0 Hz, C-4A,D or B,E), 89.9 (C-4B,E or A,D), 97.6 (C-1A,D or B,E), 98.0 (C-1B,E or A,D), 101.0 (C-1C,F), 128.3 (virtual t, |3*J*C,P + 5*J*C,P’| = 9.0 Hz, *m*-C), 129.2 (*p*-C), 130.6 (virtual t, |2*J*C,P + 4*J*C,P’| = 10.0 Hz, *o*-C), 135.4 (virtual t, |1*J*C,P + 3*J*C,P’| = 42.5 Hz, *ipso*-C); 31P {1H} NMR (121.5 MHz, CDCl3, 25 °C):  = 3.8 (s). C63H97O26P2PdCl (1474.26): calcd C, 51.33; H, 6.63; found: C, 51.50; H, 6.69. MS (Maldi TOF): *m/z* (%): 1474 (6) [*M*]+, 1459 (22) [*M* – Me]+, 1437 (15) [*M* – Cl]+, 1422 (66) [*M* – Me – Cl]+.
